# Supplementary material for: Effects of Artificial Light at Night on Photosynthesis and Respiration of Two Urban Vascular Plants
Source: MDPI journal article supplement (doi:10.3390/f15040659), 2024-04-04
Supplement: s1 [file s1]

## Supplementary Materials

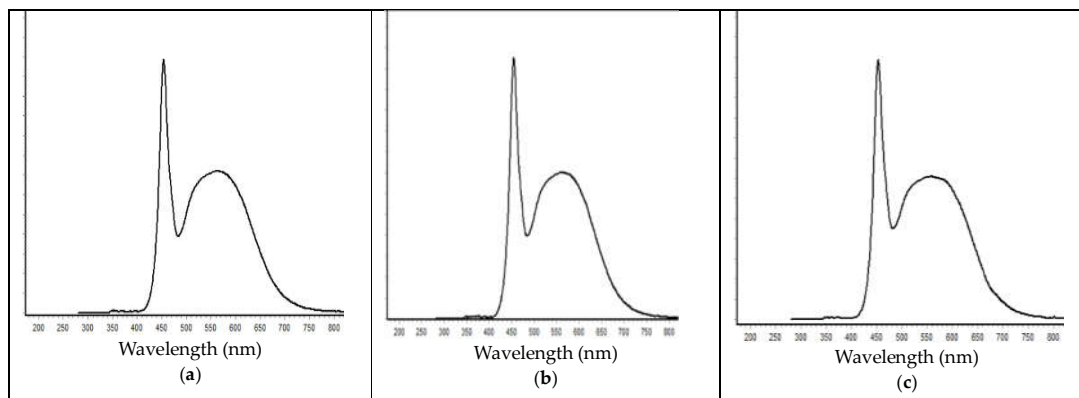

**Figure S1.** Wavelength distributions in low (a), middle (b) and high (c) intensities respectively.

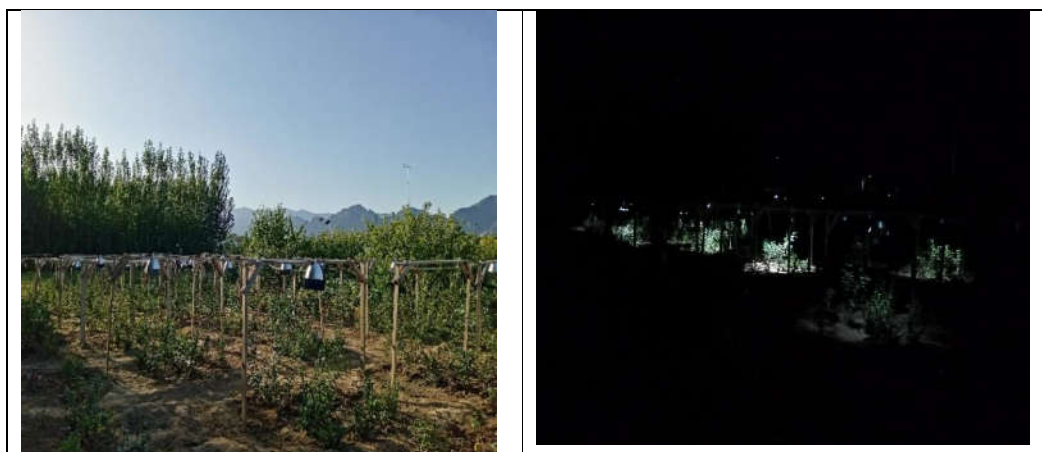

**Figure S2.** Images of the field experiment during the day and at night. (Note: the extra pots were used for other experiments, and did not cause cross influence in this study).

**Table S1.** light intensity received by the uppermost part of *Euonymus japonicus* Thunb and *Rosa hybrida* E.H.L.Krause in different treatments (lux).

| Species                          | Month     | C-L            | C-M            | C-H            | NC-L           | NC-L           | NC-L           |
|----------------------------------|-----------|----------------|----------------|----------------|----------------|----------------|----------------|
| <i>Euonymus japonicus</i> Thunb  | July      | 115.67 ± 9.07  | 186 ± 9.17     | 287.67 ± 10.02 | 117.33 ± 12.90 | 191.33 ± 12.66 | 293 ± 11.14    |
|                                  | September | 128.33 ± 7.02  | 219.33 ± 12.50 | 328.67 ± 9.71  | 133.67 ± 13.43 | 215.33 ± 11.59 | 325 ± 13.11    |
| <i>Rosa hybrida</i> E.H.L.Krause | July      | 215.67 ± 18.15 | 396.33 ± 22.01 | 594.33 ± 21.55 | 197.33 ± 12.06 | 390.33 ± 16.56 | 598.67 ± 20.11 |
|                                  | September | 253.33 ± 18.61 | 432.33 ± 23.18 | 647.67 ± 14.50 | 264.67 ± 17.56 | 434.33 ± 24.83 | 655.67 ± 23.07 |

Note: 50 lux ≈ 1 μmoles photons m<sup>-2</sup>s<sup>-1</sup>.

**Table S2.** Total antioxidant capacity of *Euonymus japonicus* Thunb and *Rosa hybrida* E.H.L.Krause in July and September under no ALAN (μmolFe<sup>2+</sup>g<sup>-1</sup>).

| Species                          | July           | September      |
|----------------------------------|----------------|----------------|
| <i>Euonymus japonicus</i> Thunb  | 104.10 ± 8.50  | 163.68 ± 14.72 |
| <i>Rosa hybrida</i> E.H.L.Krause | 312.49 ± 33.86 | 375.56 ± 27.62 |
